# Supplementary material
Source: PubMed Central journal article supplement (PMC7446632)
Supplement: i1537-2073-22-4-165_s01.pdf [file i1537-2073-22-4-165_s01.pdf]

**Table S1. Clinical and MRI outcomes from double-blind, randomized, placebo-controlled trials of IFN $\beta$  therapies in patients with RRMS**

| Reference                                                                                    | Population and study design                                            | Interferon         | Clinical outcomes                                                                                                                                                                                                              |                                                                                                                                                                        |                                                                                                                            |                                                                | MRI outcomes <sup>a</sup>                                                                                                                                                                                                                                                                                                                                                                                |
|----------------------------------------------------------------------------------------------|------------------------------------------------------------------------|--------------------|--------------------------------------------------------------------------------------------------------------------------------------------------------------------------------------------------------------------------------|------------------------------------------------------------------------------------------------------------------------------------------------------------------------|----------------------------------------------------------------------------------------------------------------------------|----------------------------------------------------------------|----------------------------------------------------------------------------------------------------------------------------------------------------------------------------------------------------------------------------------------------------------------------------------------------------------------------------------------------------------------------------------------------------------|
|                                                                                              |                                                                        |                    | ARR                                                                                                                                                                                                                            | Median time to first relapse                                                                                                                                           | Other                                                                                                                      | Progression of disability                                      |                                                                                                                                                                                                                                                                                                                                                                                                          |
| IFNB Multiple Sclerosis Study Group et al <sup>27,28</sup><br><br>Goodin et al <sup>33</sup> | N = 372<br><br>Two pooled 5-y trials; 21-y follow-up survival analysis | IFN $\beta$ -1b    | Placebo: 1.12 (95% CI, 1.02-1.23)<br>1.6 MIU: 0.96 (95% CI, 0.87-1.06) <sup>b</sup><br>8 MIU: 0.78 (95% CI, 0.7-0.88)<br><br>• ~30% reduction in ARR with 8 MIU vs placebo during all 5 y, but $P < .05$ only during years 1-2 | <u>Year 2</u><br>Placebo: 153 d<br>1.6 MIU: 180 d<br>8 MIU: 295 d <sup>d,e</sup><br><br><u>Year 3</u><br>Placebo: 147 d<br>1.6 MIU: 199 d<br>8 MIU: 264 d <sup>e</sup> | Reduction in 21-y all-cause mortality vs placebo:<br><br>50 $\mu$ g: 46.0% <sup>e</sup><br>250 $\mu$ g: 46.8% <sup>e</sup> | No statistically significant difference between groups         | Outcome: median change in lesion area<br><br><u>Year 1</u><br>Placebo: $\uparrow$ 6.7%<br>1.6 MIU: $\uparrow$ 5.7%<br>8 MIU: $\downarrow$ 4.9% <sup>b</sup><br><br><u>Year 3</u><br>Placebo: $\uparrow$ 21.0%<br>1.6 MIU: $\uparrow$ 6.1%<br>8 MIU: $\downarrow$ 3.8% <sup>c</sup><br><br><u>Year 5</u><br>Placebo: $\uparrow$ 30.2%<br>1.6 MIU: $\uparrow$ 10.6%<br>8 MIU: $\uparrow$ 3.6% <sup>e</sup> |
| Jacobs et al <sup>29</sup>                                                                   | MSCRG<br><br>N = 301<br><br>104 wk                                     | IFN $\beta$ -1a IM | Placebo: 0.90<br>IFN $\beta$ -1a: 0.61 <sup>b</sup>                                                                                                                                                                            | Placebo: 36.1 wk<br>IFN $\beta$ -1a: 47.3 wk                                                                                                                           | Probability of sustained progression:<br><br>Placebo: 34.9%<br>IFN $\beta$ -1a: 21.9%                                      | Delayed time to sustained progression vs placebo ( $P = .02$ ) | Outcome: median change in T2 lesion volume<br><br><u>Year 1</u><br>Placebo: $\downarrow$ 3.3%<br>IFN $\beta$ -1a: $\downarrow$ 13.1% <sup>d</sup><br><br><u>Year 2</u><br>Placebo: $\downarrow$ 6.5%<br>IFN $\beta$ -1a: $\downarrow$ 13.2%                                                                                                                                                              |

|                                                                 |                                                             |                       |                                                                                                      |                                                                                     |                                                                                                                                                                                                                                               |                                                                                                                                        |                                                                                                                                                                                                                                                                                                                                                                                                                                                          |
|-----------------------------------------------------------------|-------------------------------------------------------------|-----------------------|------------------------------------------------------------------------------------------------------|-------------------------------------------------------------------------------------|-----------------------------------------------------------------------------------------------------------------------------------------------------------------------------------------------------------------------------------------------|----------------------------------------------------------------------------------------------------------------------------------------|----------------------------------------------------------------------------------------------------------------------------------------------------------------------------------------------------------------------------------------------------------------------------------------------------------------------------------------------------------------------------------------------------------------------------------------------------------|
| PRISMS Study Group <sup>3</sup>                                 | PRISMS<br>N = 560<br>2 y                                    | IFNβ-1a SC            | Mean relapses over 2 y:<br><br>Placebo: 2.56<br>22 µg: 1.82 <sup>b</sup><br>44 µg: 1.73 <sup>b</sup> | Placebo: NR<br>22 µg: delayed 3 mo <sup>b</sup><br>44 µg: delayed 5 mo <sup>b</sup> | Percentage reduction in relapses vs placebo:<br><br>22 µg: 27% (95% CI, 14%-39%) <sup>b</sup><br>44 µg: 33% (95% CI, 21%-44%) <sup>b</sup><br><br>• Significant reduction in severity of relapse vs placebo for both doses ( <i>P</i> < .005) |                                                                                                                                        | Number of T2 active lesions vs placebo:<br><br>22 mg: ↓67% <sup>c</sup><br>44 mg: ↓78% <sup>c,f</sup>                                                                                                                                                                                                                                                                                                                                                    |
| Calabresi et al <sup>26</sup><br><br>Arnold et al <sup>34</sup> | ADVANCE<br>N = 1512<br><br>48-wk trial; 96-wk MRI follow-up | Peginterferon beta-1a | Placebo: 0.397<br>2-wk dosing: 0.256 <sup>c</sup><br>4-wk dosing: 0.288 <sup>e</sup>                 | NR                                                                                  | Risk of relapse vs placebo (HR [95% CI]): 2-wk dosing: 0.61 (0.47-0.80) <sup>c</sup><br>4-wk dosing: 0.74 (0.57-0.95) <sup>e</sup>                                                                                                            | Risk of progression vs placebo (HR [95% CI]): 2-wk dosing: 0.62 (0.40-0.97) <sup>e</sup><br>4-wk dosing: 0.62 (0.40-0.97) <sup>f</sup> | Change in T1 lesion formation vs delayed treatment <sup>g</sup> : 2-wk dosing: ↓58% <sup>c</sup><br>Every-4-wk dosing: ↓52% <sup>h</sup><br><br>• Active lesion formation ↓65% with 2-wk dosing vs delayed treatment; ↓55% vs 4-wk dosing ( <i>P</i> < .001 for both)<br>Outcome: mean change in T2 lesion volume<br>Delayed treatment: ↑0.62 cm <sup>3</sup><br>2-wk dosing: ↓0.23 cm <sup>3</sup> <sup>h,i</sup><br>4-wk dosing: ↑0.36 cm <sup>3</sup> |

Note: See main text for full reference information.

Abbreviations: ARR, annualized relapse rate; HR, hazard ratio; IFN, interferon; IM, intramuscular; MIU, million international units; MRI, magnetic resonance imaging; MSCRG, Multiple Sclerosis Collaborative Research Group; NR, not reported; PRISMS, Prevention of Relapses and Disability by Interferon beta-1a Subcutaneously in Multiple Sclerosis; RRMS, relapsing-remitting multiple sclerosis; SC, subcutaneous.

<sup>a</sup>Increase and decrease in MRI outcomes indicated by ↑ and ↓, respectively.

<sup>b</sup> $P < .01$  vs placebo.

<sup>c</sup> $P < .001$  vs placebo.

<sup>d</sup> $P < .05$  vs 1.6 MIU.

<sup>e</sup> $P < .05$  vs placebo.

<sup>f</sup> $P < .001$  vs 22 μg.

<sup>g</sup>Placebo in year 1, followed by peginterferon beta-1a every 2 weeks or every 4 weeks in year 2.

<sup>h</sup> $P < .001$  vs delayed treatment.

<sup>i</sup> $P < .05$  vs every-4-weeks dosing.
